# Supplementary material
Source: PubMed Central journal article supplement (PMC2915727)
Supplement: supp_M110.128850_jbc.M110.128850-1.pdf [file supp_M110.128850_jbc.M110.128850-1.pdf]

**Supplemental Table 1.** Exact mass of asukamycin and its derivatives.

|                 | Formula                                                       | Calculated<br>Mass | Observed<br>Mass | Mass Error<br>(ppm) | Upper Chain<br>Fragment |
|-----------------|---------------------------------------------------------------|--------------------|------------------|---------------------|-------------------------|
| <b>A1</b>       | C <sub>31</sub> H <sub>34</sub> N <sub>2</sub> O <sub>7</sub> | 546.2366           | 546.2360         | 1.19                | 189.13                  |
| <b>A2</b>       | C <sub>28</sub> H <sub>30</sub> N <sub>2</sub> O <sub>7</sub> | 506.2053           | 506.2062         | 1.78                | 149.09                  |
| <b>A3, A4</b>   | C <sub>29</sub> H <sub>32</sub> N <sub>2</sub> O <sub>7</sub> | 520.2210           | 520.2228         | 3.62                | 163.11                  |
| <b>A5</b>       | C <sub>30</sub> H <sub>34</sub> N <sub>2</sub> O <sub>7</sub> | 534.2366           | 534.2377         | 2.05                | 177.13                  |
| <b>A6, A7</b>   | C <sub>31</sub> H <sub>36</sub> N <sub>2</sub> O <sub>7</sub> | 548.2523           | 548.2530         | 1.36                | 191.14                  |
| <b>B1</b>       | C <sub>31</sub> H <sub>36</sub> N <sub>2</sub> O <sub>7</sub> | 548.2523           | 548.2528         | 0.91                | 189.13                  |
| <b>B2</b>       | C <sub>28</sub> H <sub>32</sub> N <sub>2</sub> O <sub>7</sub> | 508.2210           | 508.2229         | 3.74                | 149.10                  |
| <b>B3, B4</b>   | C <sub>29</sub> H <sub>34</sub> N <sub>2</sub> O <sub>7</sub> | 522.2366           | 522.2382         | 3.06                | 163.11                  |
| <b>B5</b>       | C <sub>30</sub> H <sub>36</sub> N <sub>2</sub> O <sub>7</sub> | 536.2523           | 536.2517         | 1.02                | 177.13                  |
| <b>C1</b>       | C <sub>31</sub> H <sub>34</sub> N <sub>2</sub> O <sub>5</sub> | 514.2468           | 514.2477         | 1.73                | 189.13                  |
| <b>C2</b>       | C <sub>28</sub> H <sub>30</sub> N <sub>2</sub> O <sub>5</sub> | 474.2155           | 474.2163         | 1.68                | 149.10                  |
| <b>C3, C4</b>   | C <sub>29</sub> H <sub>32</sub> N <sub>2</sub> O <sub>5</sub> | 488.2311           | 488.2317         | 1.15                | 163.11                  |
| <b>C5</b>       | C <sub>30</sub> H <sub>34</sub> N <sub>2</sub> O <sub>5</sub> | 502.2468           | 502.2477         | 1.77                | 177.13                  |
| <b>D1</b>       | C <sub>31</sub> H <sub>34</sub> N <sub>2</sub> O <sub>6</sub> | 530.2417           | 530.2422         | 0.90                | 189.13                  |
| <b>D2</b>       | C <sub>29</sub> H <sub>32</sub> N <sub>2</sub> O <sub>6</sub> | 504.2260           | 504.2254         | 1.25                | 149.10                  |
| <b>D3, D4</b>   | C <sub>28</sub> H <sub>30</sub> N <sub>2</sub> O <sub>6</sub> | 490.2104           | 490.2110         | 1.34                | 163.11                  |
| <b>D5</b>       | C <sub>30</sub> H <sub>34</sub> N <sub>2</sub> O <sub>6</sub> | 518.2417           | 518.2411         | 1.06                | 177.13                  |
| <b>A8</b>       | C <sub>20</sub> H <sub>20</sub> N <sub>2</sub> O <sub>7</sub> | 400.1271           | 400.1289         | 4.73                | ---                     |
| <b>B8</b>       | C <sub>20</sub> H <sub>22</sub> N <sub>2</sub> O <sub>7</sub> | 402.1427           | 402.1444         | 4.19                | ---                     |
| <b>C8</b>       | C <sub>20</sub> H <sub>20</sub> N <sub>2</sub> O <sub>5</sub> | 368.1372           | 368.1394         | 6.02                | ---                     |
| <b>A1a</b>      | C <sub>26</sub> H <sub>29</sub> NO <sub>6</sub>               | 451.1995           | 451.2010         | 3.44                | 189.13                  |
| <b>A2a</b>      | C <sub>23</sub> H <sub>25</sub> NO <sub>6</sub>               | 411.1682           | 411.1657         | 6.13                | 149.09                  |
| <b>A3a,A4a</b>  | C <sub>24</sub> H <sub>27</sub> NO <sub>6</sub>               | 425.1838           | 425.1804         | 8.13                | 163.11                  |
| <b>A5a</b>      | C <sub>25</sub> H <sub>29</sub> NO <sub>6</sub>               | 439.1995           | 439.1990         | 1.09                | 177.12                  |
| <b>B1a</b>      | C <sub>26</sub> H <sub>31</sub> NO <sub>6</sub>               | 453.2151           | 453.2171         | 4.43                | 189.13                  |
| <b>B2a</b>      | C <sub>23</sub> H <sub>27</sub> NO <sub>6</sub>               | 413.1838           | 413.1801         | 8.93                | 149.09                  |
| <b>B3a, B4a</b> | C <sub>24</sub> H <sub>29</sub> NO <sub>6</sub>               | 427.1995           | 427.1956         | 9.19                | 163.10                  |
| <b>B5a</b>      | C <sub>25</sub> H <sub>31</sub> NO <sub>6</sub>               | 441.2151           | 441.2120         | 7.05                | 177.12                  |

**Supplemental Table 2.** NMR connectivities in 4-hydroxyprotoasukamycin (**D1**) observed by  $^1J$ - and  $^nJ$ -heteronuclear carbon-proton shift correlation methods (HSQC and HMBC).

| Position | $\delta_C$ (ppm) | $\delta_H$ (ppm)             | C,H-Coupling <sup>a</sup>        |
|----------|------------------|------------------------------|----------------------------------|
| 1        | 180.07           | --                           | 6-H, 0-NH, 5-H, 3-H              |
| 2        | 140.95           | --                           | --                               |
| 3        | 124.57           | 6.21 (d, $J=10.1$ )          | 0-NH (w)                         |
| 4        | 69.63            | --                           | 7-H, 3-H, 8-H, 5-H (w), 0-NH (w) |
| 5        | 152.53           | 6.93 (dd, $J=10.0, 3.1$ )    | 6-H, 7-H, 3-H (w)                |
| 6        | 130.64           | 7.62 (d, $J=2.95$ )          | 5-H, 3-H, 7-H, 0-NH              |
| 7        | 137.64           | 5.80 (d, $J=15.5$ )          | 6-H, 5-H, 3-H, 8-H, 9-H          |
| 8        | 131.12           | 6.48 (dd, $J=14.8, 11.8$ )   | 9-H, 10-H                        |
| 9        | 138.97           | 6.66 (dd, $J=14.8, 11.2$ )   | 7-H, 8-H, 11-H                   |
| 10       | 129.35           | 6.53 (dd, $J=15.37, 11.31$ ) | 8-H, 11-H                        |
| 11       | 141.23           | 7.07 (dd, $J=15.0, 11.6$ )   | 10-H, 12-H                       |
| 12       | 123.47           | 6.46 (d, $J=15.2$ )          | 11-H, 10-H                       |
| 13       | 164.94           | --                           | 14-NH                            |
| 1'       | 164.94           | --                           | 0-NH, 2'-H                       |
| 2'       | 123.85           | 6.51 (d, $J=15.2$ )          | 3'-H, 4'-H                       |
| 3'       | 141.23           | 7.15 (dd, $J=15.0, 11.6$ )   | 2'-H, 4'-H, 5'-H                 |
| 4'       | 128.53           | 6.30 (dd, $J=14.9, 11.7$ )   | 3'-H, 2'-H, 6'-H                 |
| 5'       | 140.59           | 6.63 (dd, $J=15.0, 10.9$ )   | 3'-H, 6'-H, 7'-H                 |
| 6'       | 127.67           | 6.18 (dd, $J=15.2, 10.9$ )   | 4'-H, 5'-H                       |
| 7'       | 144.84           | 5.90 (dd, $J=15.4, 7.0$ )    | 5'-H, 9'/13'-H (w)               |
| 8'       | 40.46            | 2.08 (m)                     | 6'-H, 7'-H, 9'/13'-H, 10'/12'-H  |
| 9',13'   | 32.10            | 1.70 (m), 1.09 (m)           | 10'/12'-H, 13'/9'-H, 7'-H, 11'-H |
| 10',12'  | 25.39            | 1.26 (m), 1.68 (m)           | 11'-H, 9'/13'-H, 12'/10'-H       |
| 11'      | 25.60            | 1.13 (m), 1.63 (m)           | 10'/12'-H, 9'/13'-H              |
| 1''      |                  |                              |                                  |
| 2''      | 113.57           | --                           |                                  |
| 3''      |                  |                              |                                  |
| 4''      |                  |                              |                                  |
| 5''      |                  |                              |                                  |
| NH-14    |                  | 9.20 (s)                     |                                  |
| NH-0'    |                  | 9.17 (s)                     |                                  |

<sup>a</sup> Indicated protons show connectivities to the given carbon attributed to  $^2J$ -,  $^3J$ - or weak  $^4J$ -coupling. (w) weak  $J$ -coupling.

<sup>b</sup> Coupling with 8'-H (2.08 ppm) was suppressed.

<sup>c</sup>  $^{13}C$ -NMR and  $^1H$ -NMR signals for C1'', C3'', C4'' and C5'' are undetectable in DMSO- $d^6$ .

**Supplemental Table 3.** Oligonucleotide primers used for the mutant constructions and  $\lambda$ -Red recombinations.

| Primers    | Sequence from 5' to 3'                                                             |
|------------|------------------------------------------------------------------------------------|
| AsuE1-1    | CCCAAGCTTCGAAGACCCGTGGCGTGAGCC                                                     |
| AsuE1-2    | CCCAGATCTCCGCGCGCACAGCAGCGC                                                        |
| AsuE1-3    | CCCAGATCTCCGGCGGTGAAGGGCGCGCAC                                                     |
| AsuE1-4    | CCCCTCGAGACCTGATGGAGGGGTCCAGTA                                                     |
| AsuRED-4   | <u>GGTCCGGAAGCGGCCCTGCGGAGCGCCCTGCGGGGCGGCTCTAGAGATATCATTCCG</u><br>GGGATCCGTCGACC |
| AsuRED-6   | <u>AGAACCACGGCTGGACCGAGGGCTGACACCCCGGGGCGTATCCGGCCGTTGTAGG</u><br>CTGGAGCTGCTTC    |
| AsuRED-E3F | <u>AGTCGTCAGCCTGCCCTACCACCACCCGTTTCATGGTGGCCTCGCGGGCCATTCCGG</u><br>GGATCCGTCGACC  |
| AsuRED-E3R | <u>AGCCGACGATCGTGCTGCGCCGGTCGATCAGCTCGGCCAGGGCCTTGCCTGTAGGC</u><br>TGGAGCTGCTTC    |
| S83TF      | AAGGATCCGGCGGCACCCGCAACATCGGTGGCACCAA                                              |
| S83TR      | GGGATGGAGGTGGTGAAGATGAAG                                                           |

\* The underlined regions indicate the DNA sequence matching pART1361.

**Supplemental Figure 1.** HPLC analysis of asukamycin metabolites. The arrows identify the peaks of asukamycin **A1** and related metabolites, **A2-A5, B1-B4, C1-C4, D1-D5, A1a-A5a, B1a-B4a**.

**a.** Twenty  $\mu\text{L}$  of crude culture extract of the *asuA1* mutant (i), the *asuA3* mutant (ii), the *asuA1* mutant supplemented with 3,4-AHBA (iii), the *asuA3* mutant supplemented with 3,4-AHBA (iv), the *asuA3* mutant supplemented with **D1** (v) and the *S. nodosus* subsp. *asukaensis* wild type strain (vi).

**b.** Twenty  $\mu\text{L}$  of crude culture extract of the *asuA2* mutant (i), the *asuC13* mutant (ii), the *asuC11C12* mutant (iii), the *S. nodosus* subsp. *asukaensis* wild type strain (iv), and 100  $\mu\text{L}$  crude co-culture extract of the *asuA2* and the *asuC1* mutant (v), the *asuC13* and the *asuC1* mutant (vi), the *asuC11C12* and the *asuC1* mutant (vii).

**c.** Twenty  $\mu\text{L}$  of crude culture extract of the *asuD1* mutant (i), the *asuD2* mutant (ii) and the *asuD3* mutant (iii).

**d.** Twenty  $\mu\text{L}$  of crude culture extract of the *asuE1* mutant (i), the *asuE2* mutant (ii), the *asuE3* mutant (iii) and the *S. nodosus* subsp. *asukaensis* wild type strain (iv).

# Supplemental Fig. 1a

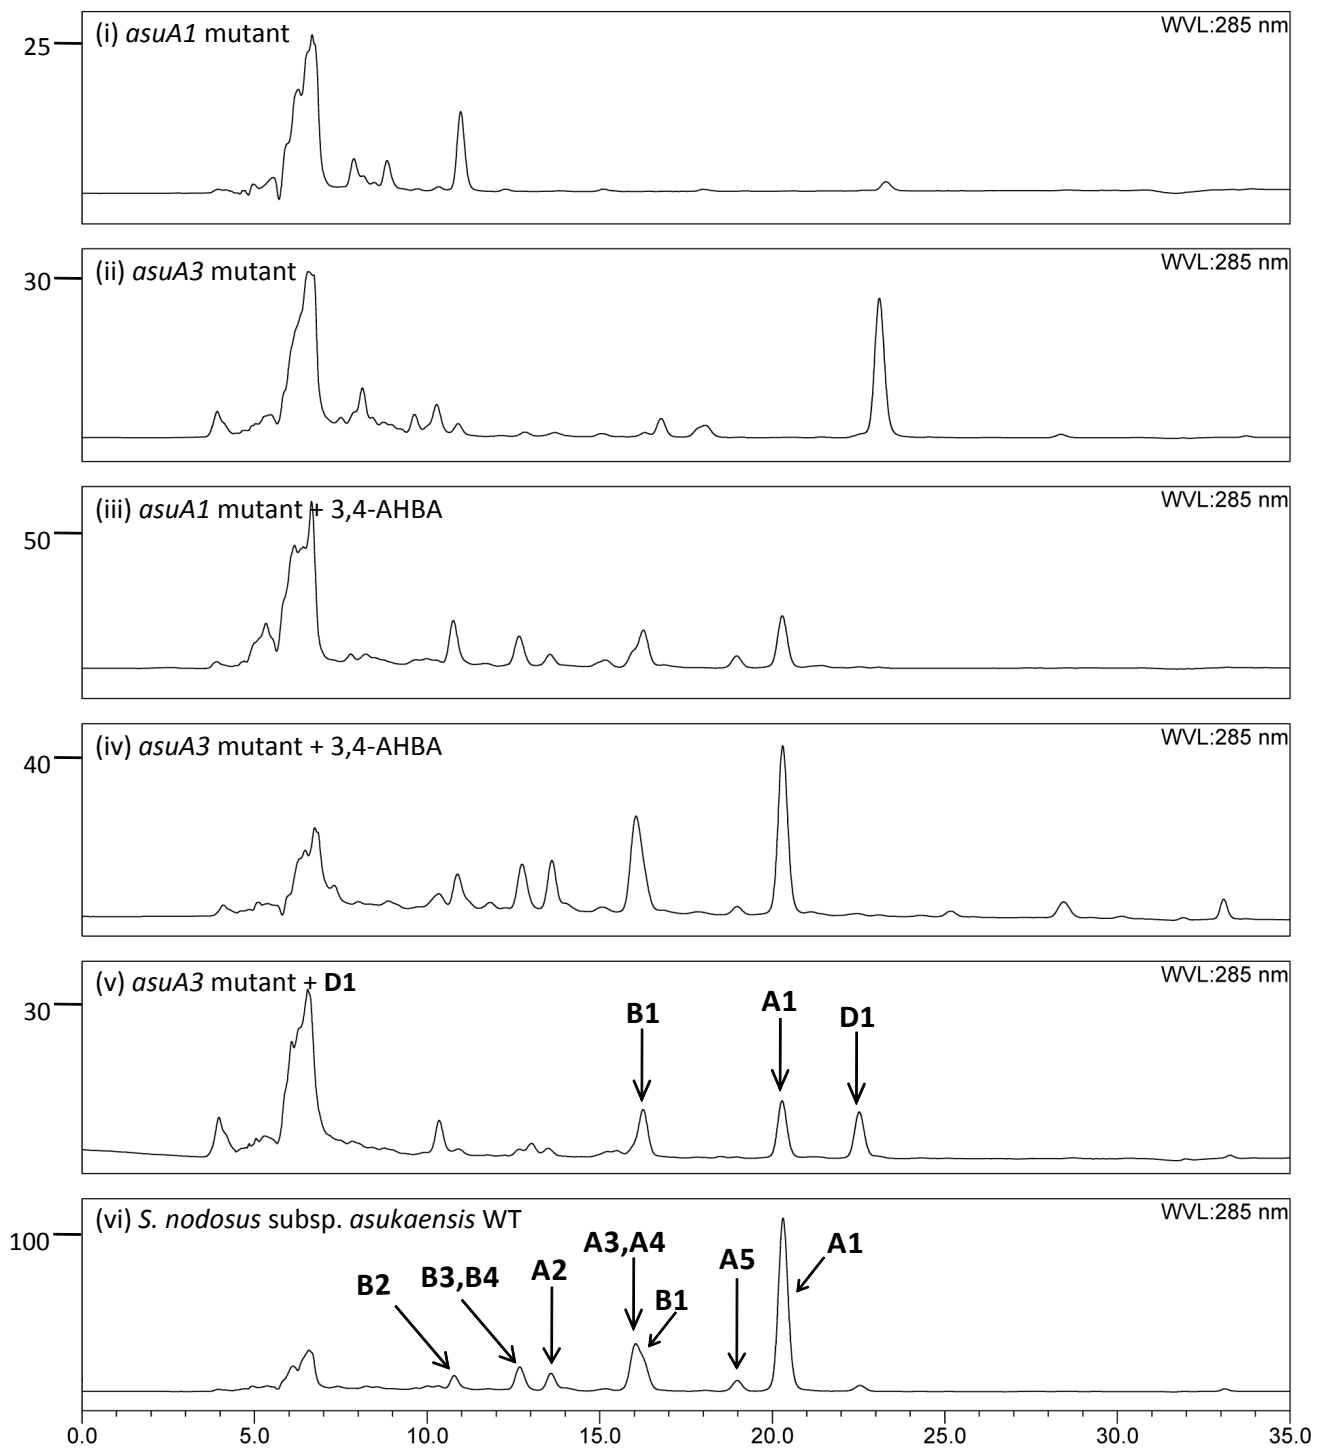

## Supplemental Fig. 1b

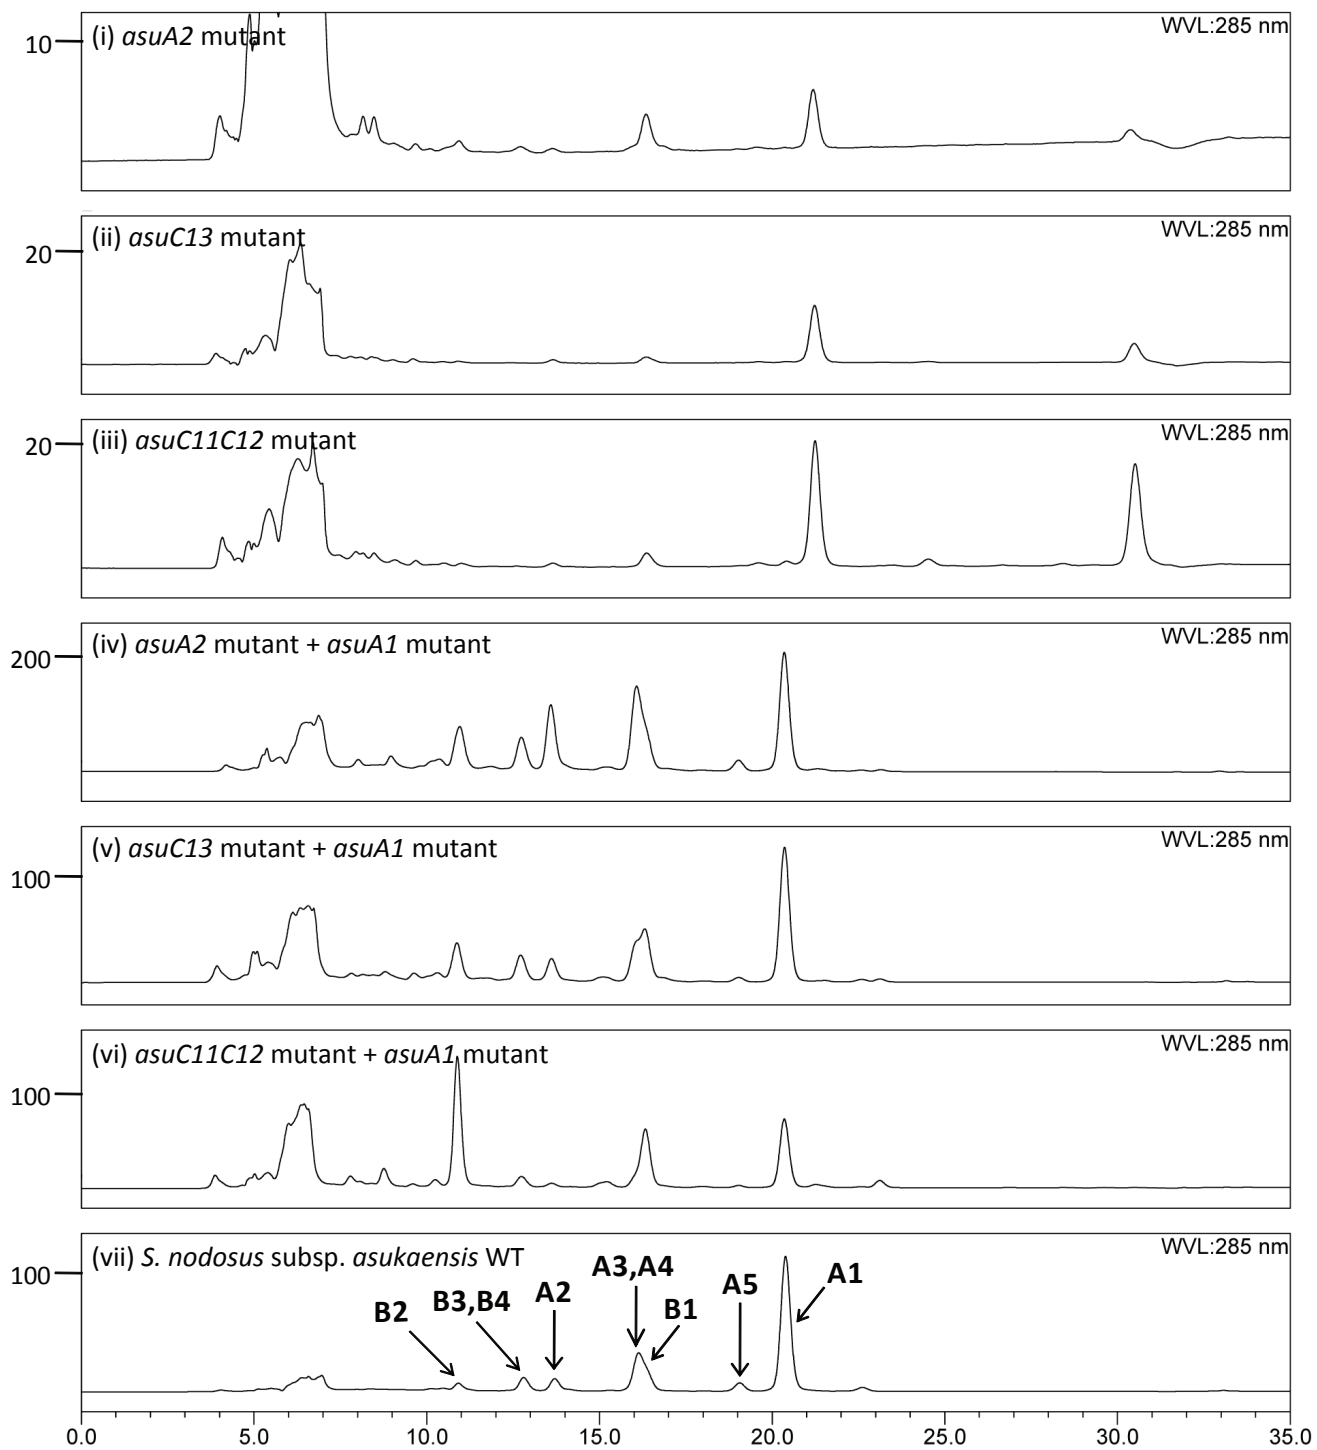

# Supplemental Fig. 1c

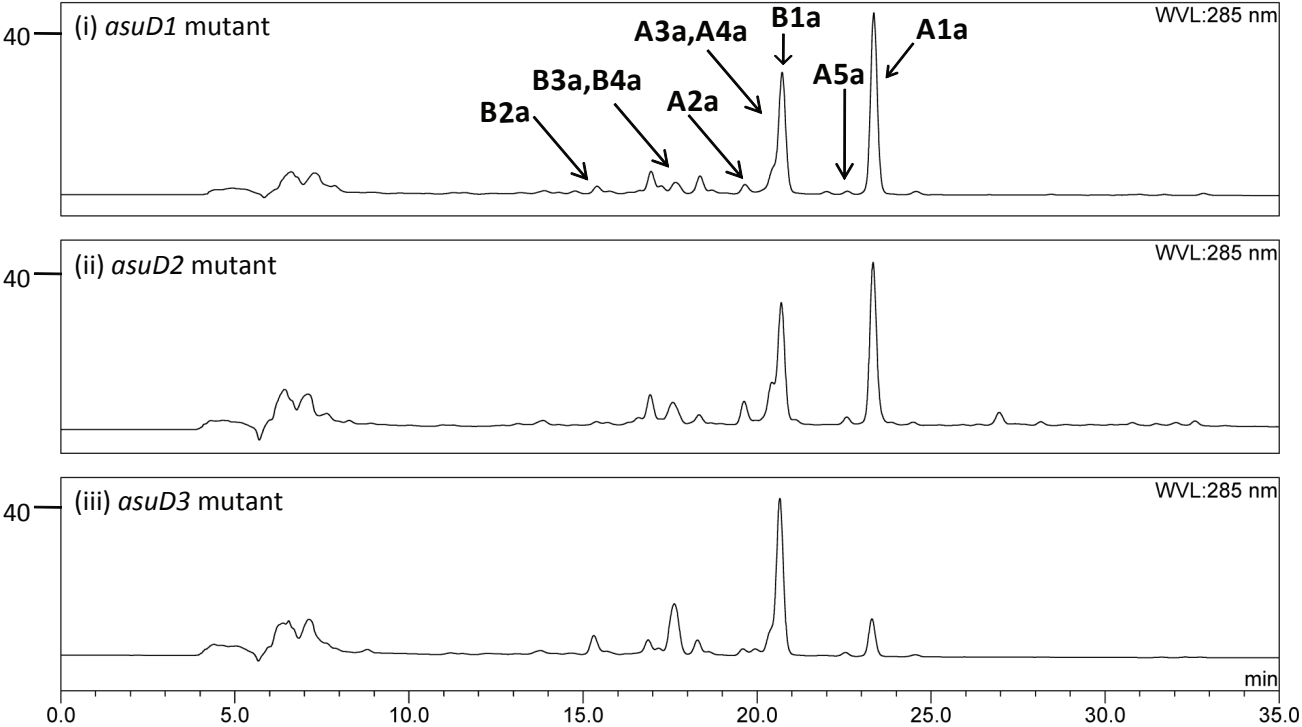

## Supplemental Fig. 1d

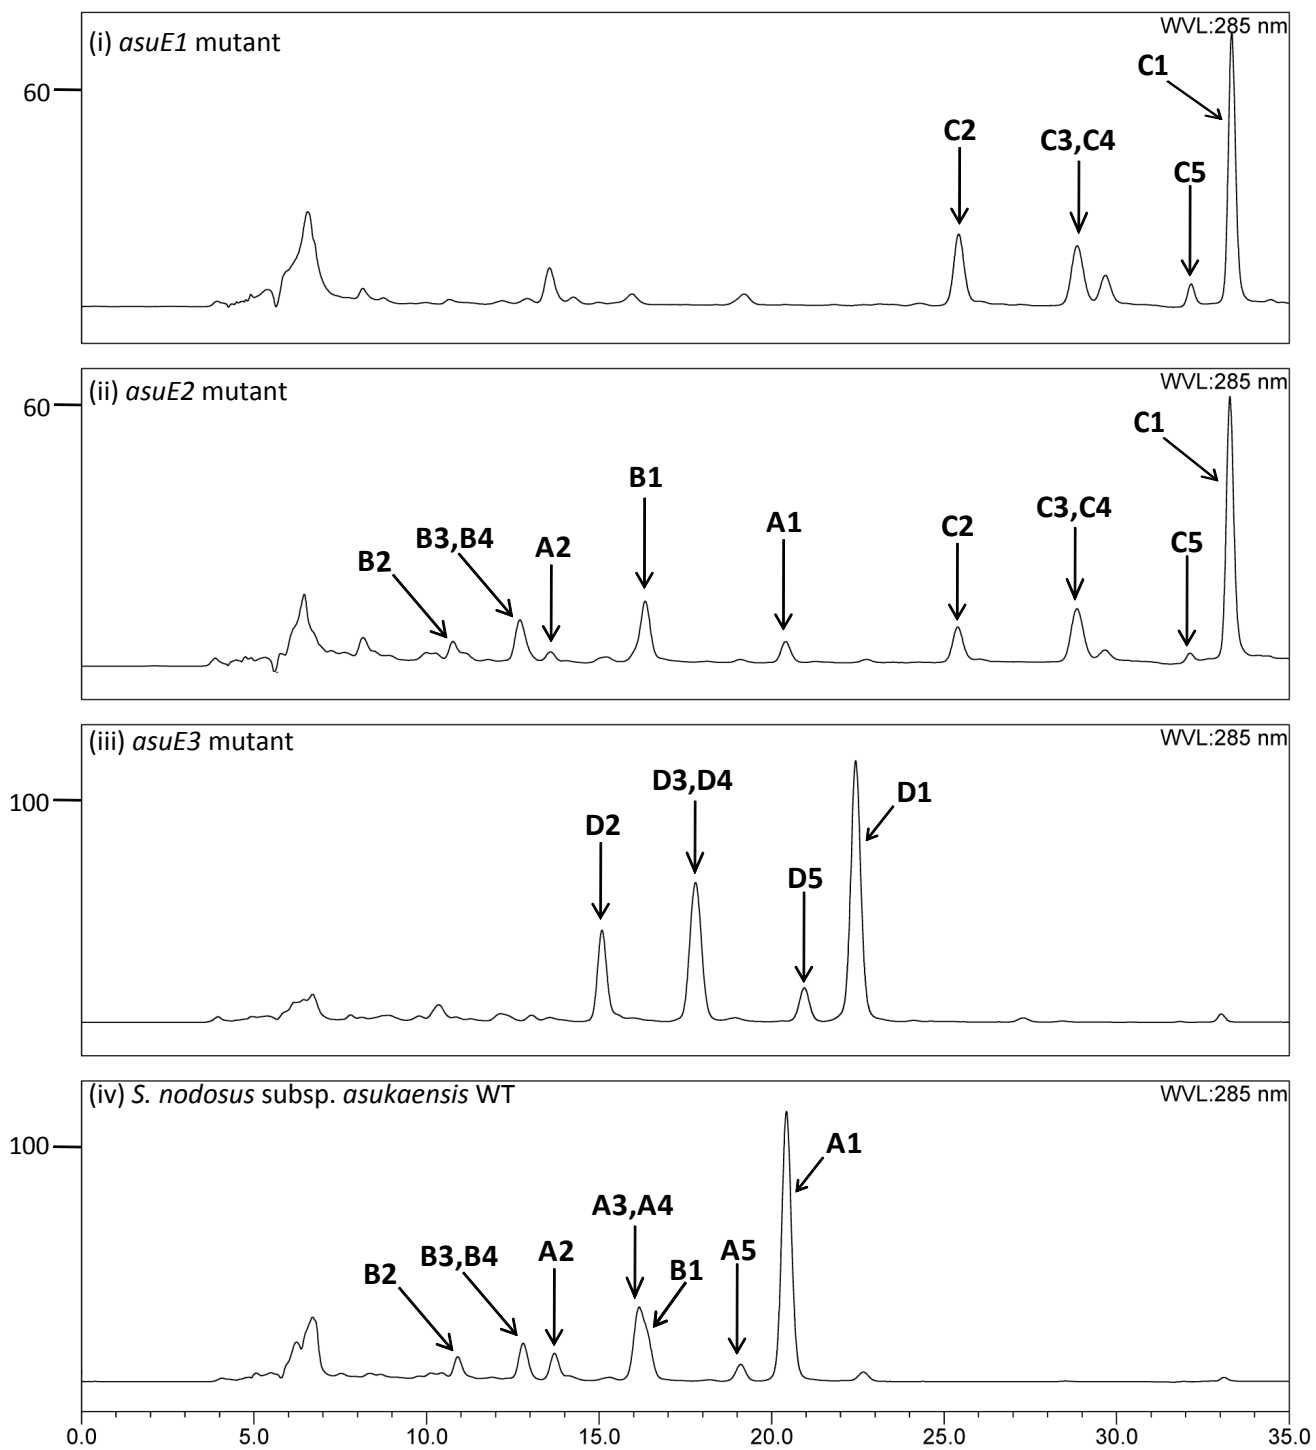



**Supplemental Figure 2.** TLC analysis and bioassay. **a.** and **c.** Chromatograms visualized under UV 254 nm. **b.** The same TLC plate was further overlaid with *Bacillus subtilis* mixed with nutrient agar and incubated overnight at 37°C. The red arrow shows the newly formed product 2880-II. Lane 1, the wild type strain; Lane 2, the *asuD2* mutant; Lane 3, the *asuD2* mutant/pALS4; Lane 4, the *asuD2* mutant/pALS4-S83T; Lane 5, standard asukamycin (10 µg); Lane 6, *S. lividans*/pAS9A1; Lane 7,8, *S. lividans*/pAS9A1 supplemented with ferulic acid (2.5 mg/ml); Lane 9, standard ferulic acid (10 µg).

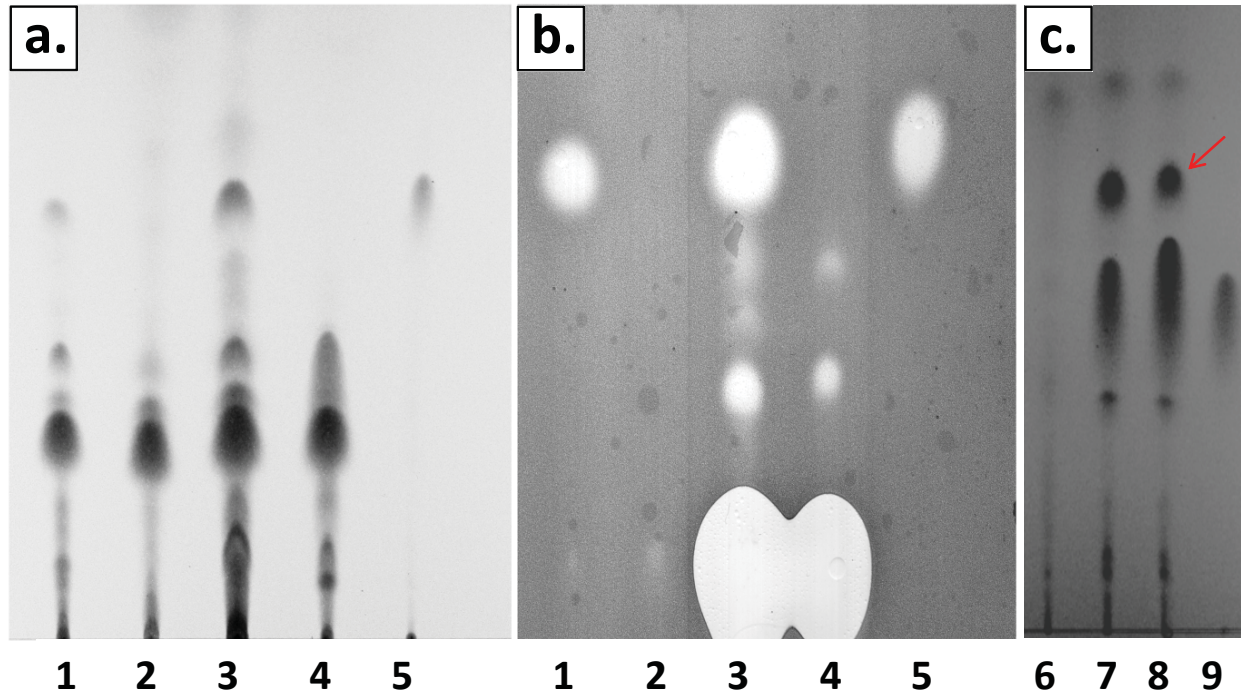

**Supplemental Figure 3.** Fatty acid profiles generated by GC-MS analysis. **a.** The *asuC15* mutant. **b.** The *S. nodosus* subsp. *asukaensis* wild type strain. The identified fatty acid derivatives are indicated.

**a. *asuC15* mutant**

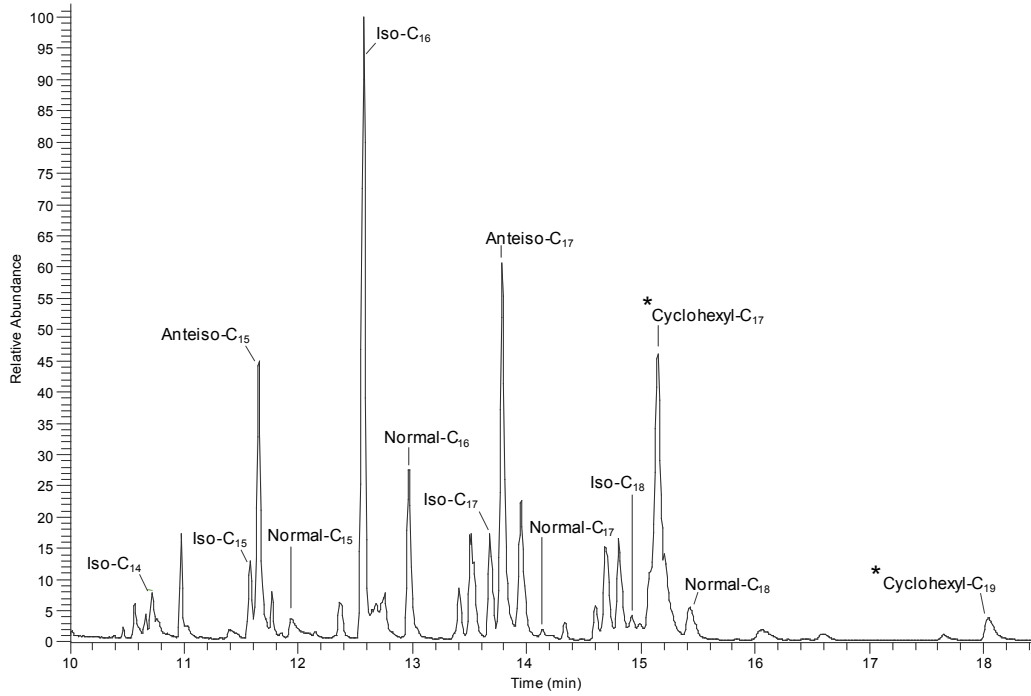

**b. *S. nodosus* subsp. *asukaensis* wild type**

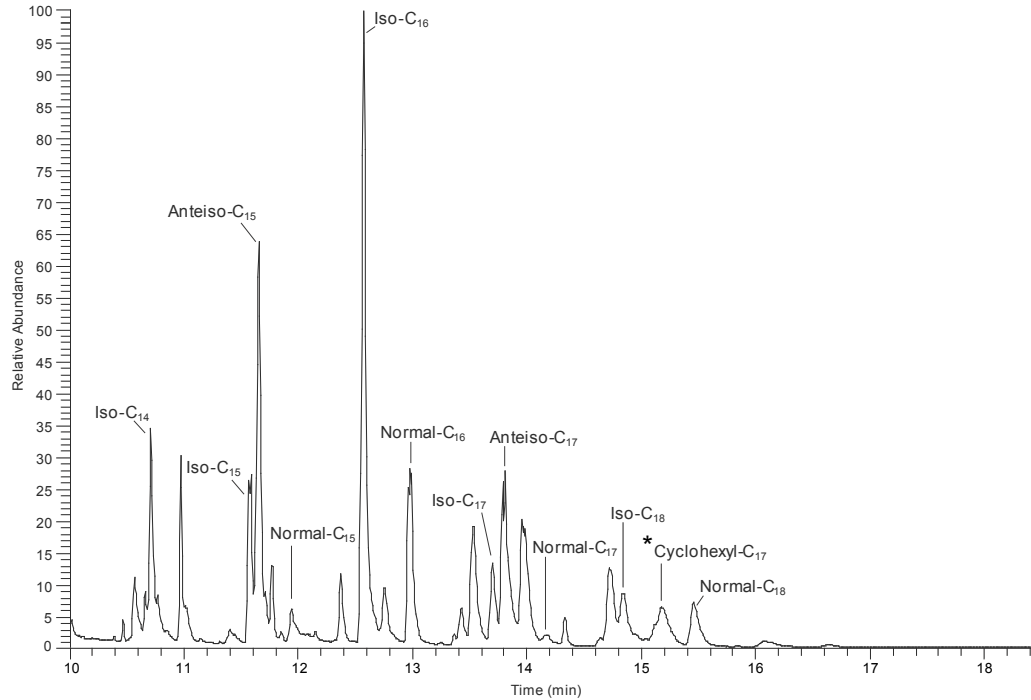

\*  $\omega$ -cyclohexyl fatty acids

**Supplemental Figure 4.** Southern blots of thirteen constructed mutants. Hybridization probes and anticipated restriction digestion patterns are indicated.

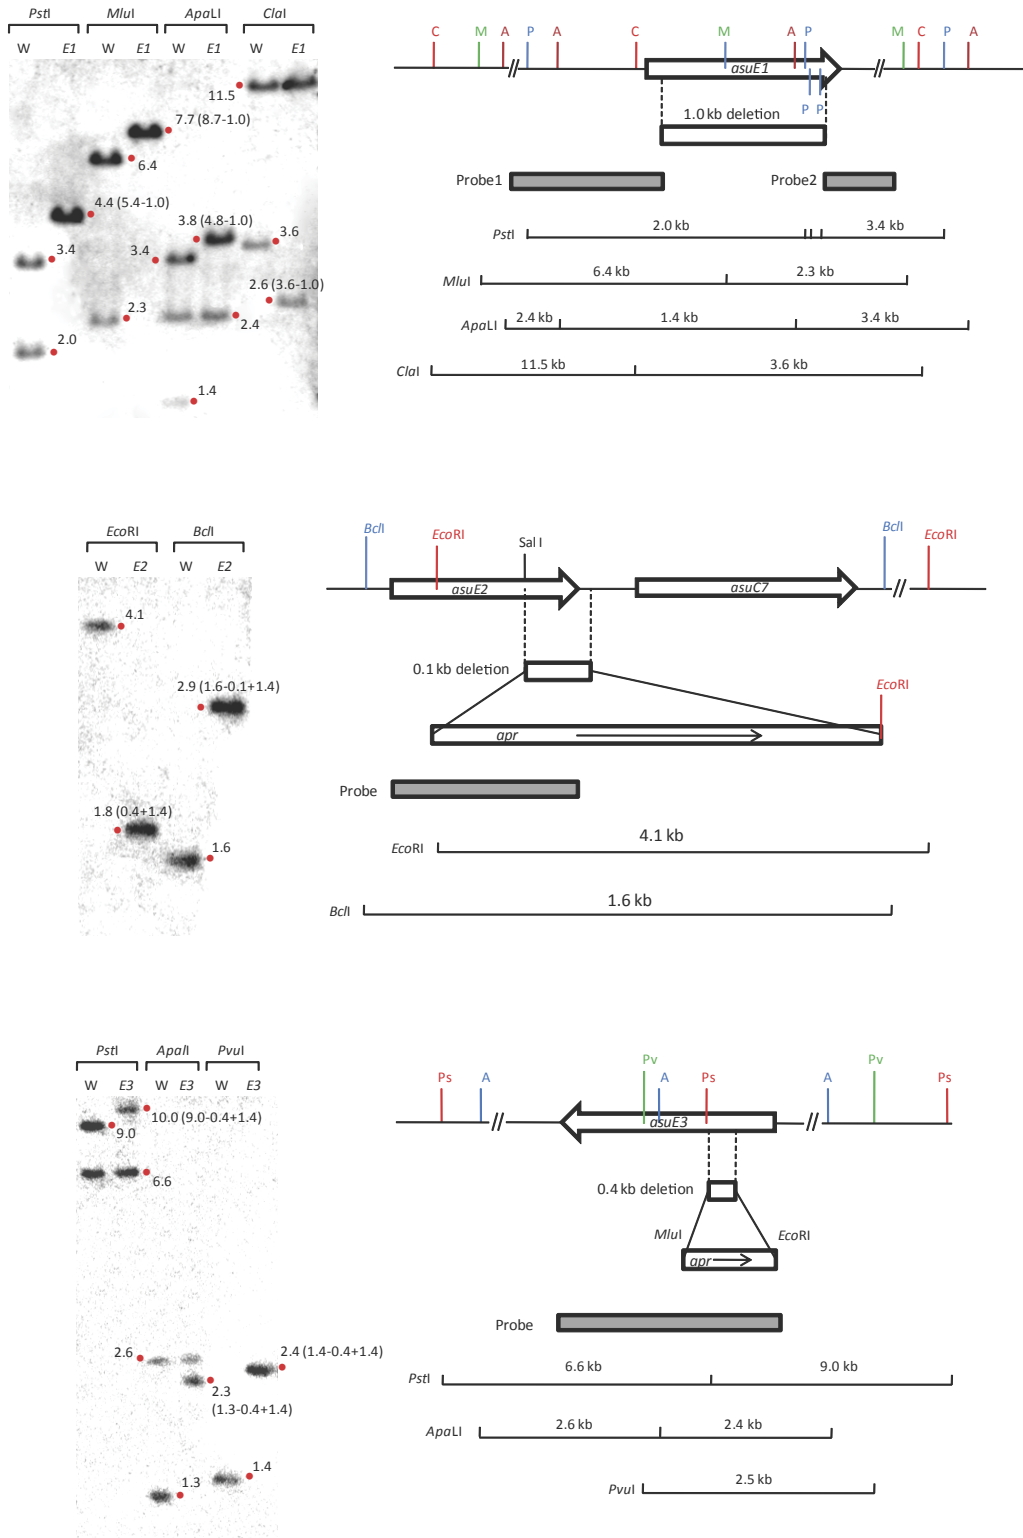

# Supplemental Fig. 4 continued

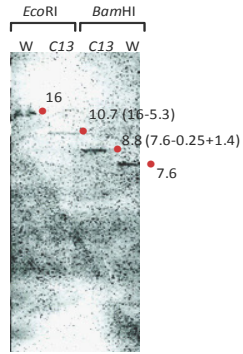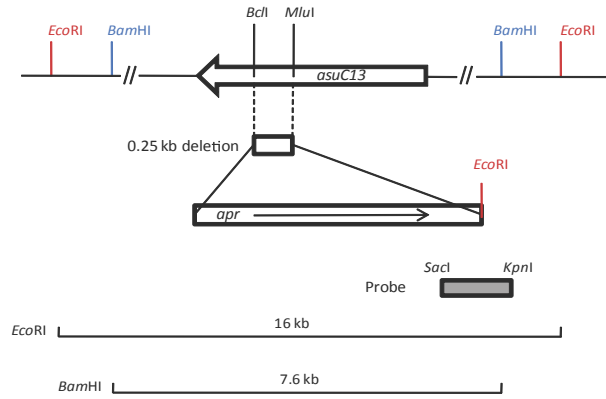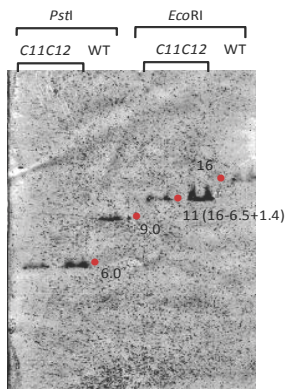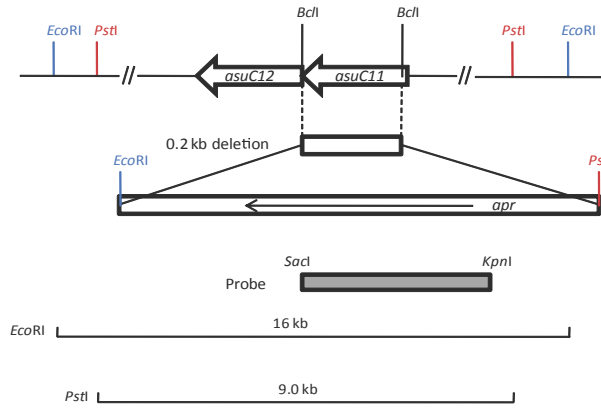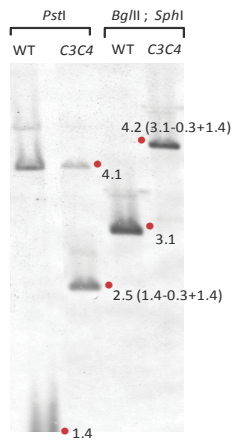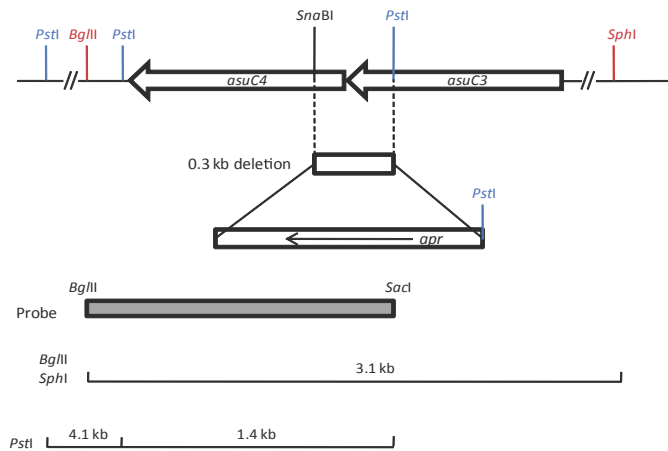

# Supplemental Fig. 4 continued

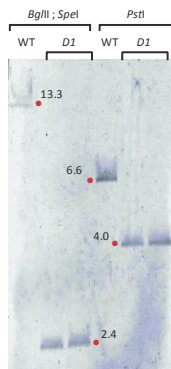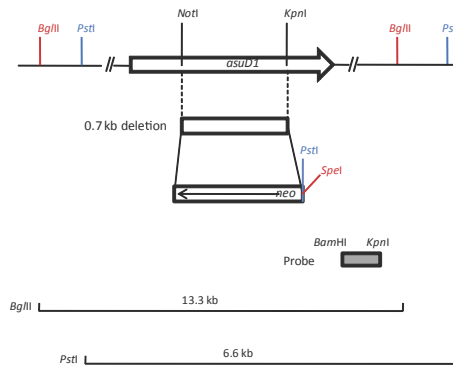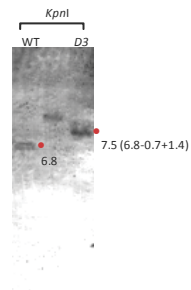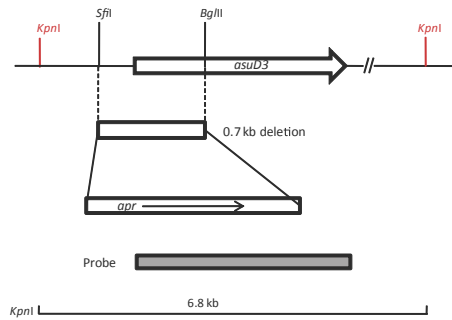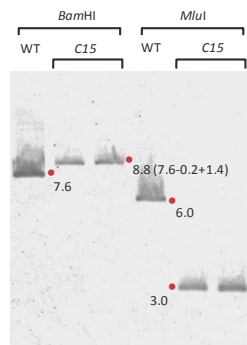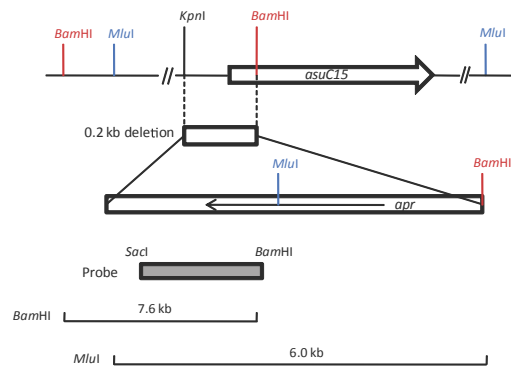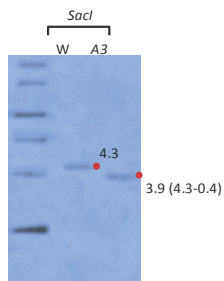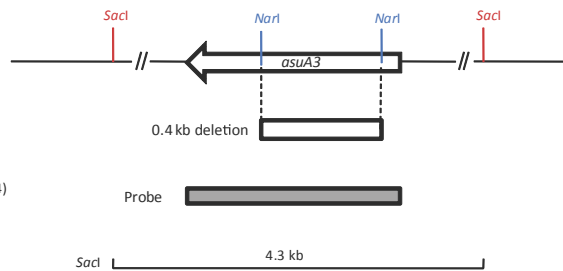

# Supplemental Fig. 4 continued

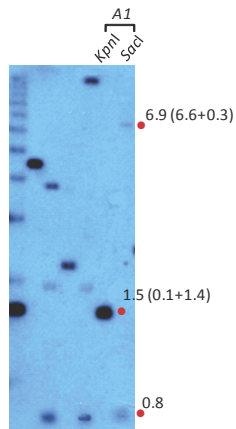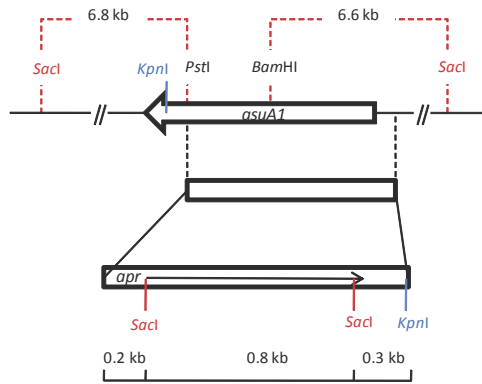

Notes: probed with apramycin resistance gene.

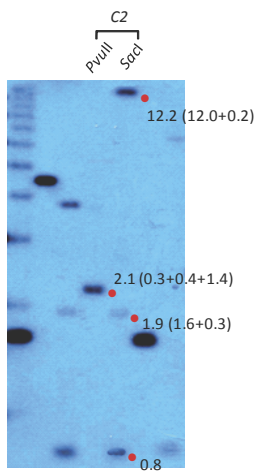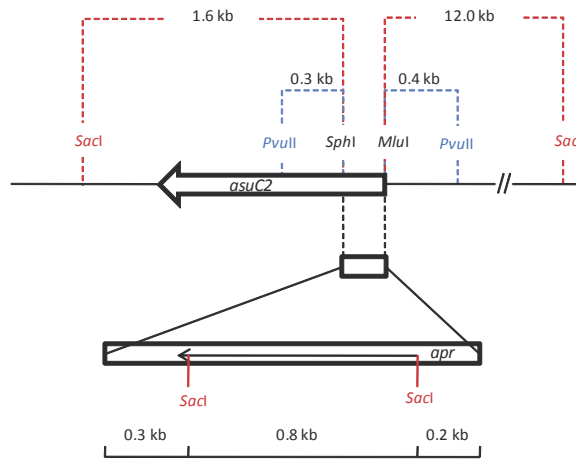

Notes: probed with apramycin resistance gene.

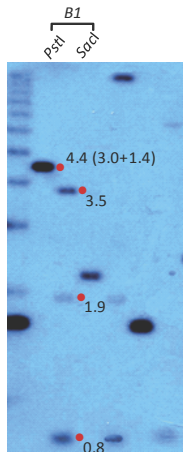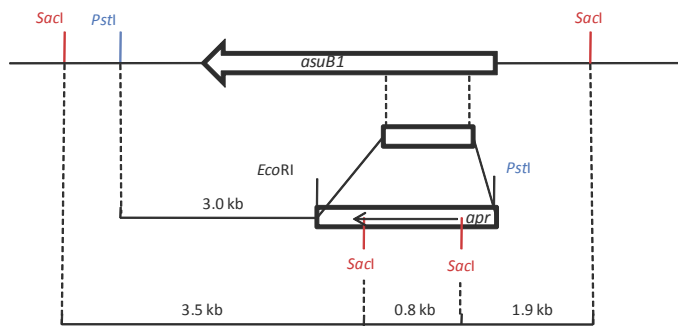

Notes: probed with apramycin resistance gene.

**Supplemental Figure 5.** Construction of pART1391. **a.** Spectinomycin resistance gene cassette (*spec*) was PCR amplified from pIJ778 using primers AsuRED-4 and -6. **b.** The  $\lambda$ -RED based recombination was conducted to replace the 25.4 kb insert region of pART1361 with a *spec* cassette to create pART1391. The predicted *EcoRI* digestion fragments are indicated (kb). **c.** Comparison of the *EcoRI* digestion pattern by DNA gel electrophoresis. Note: Lane pART1381 indicates another pART1361 derived cosmid clone which is not related to this study.

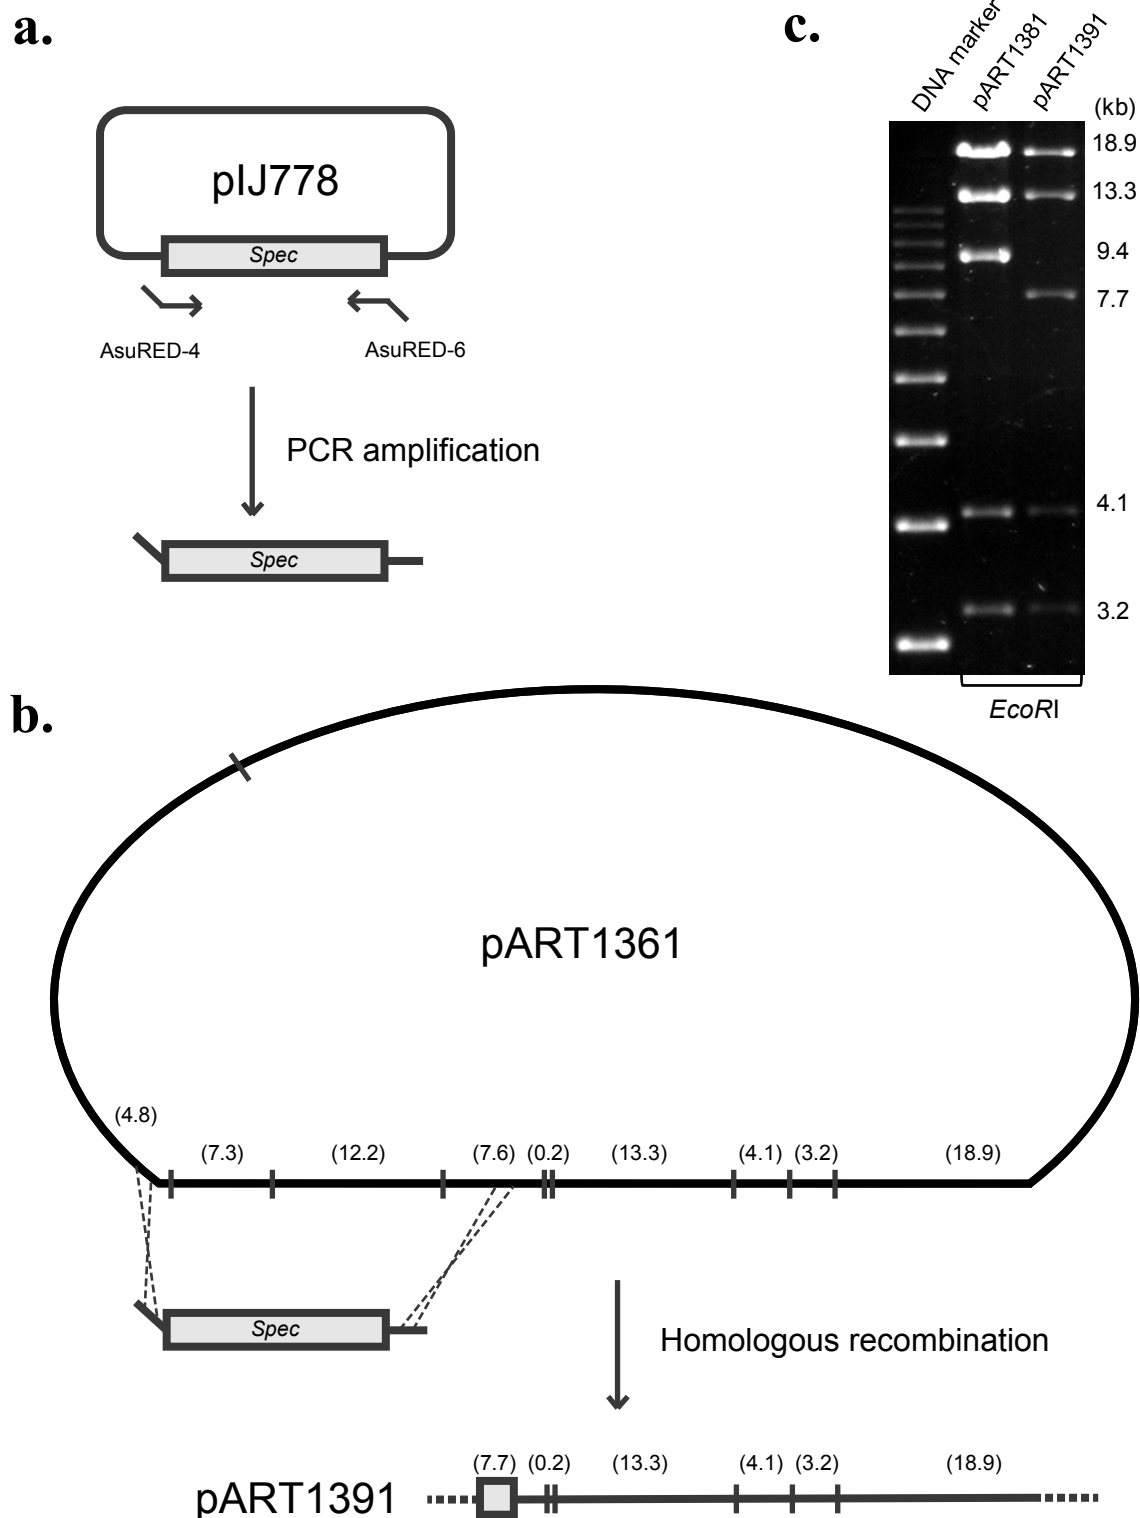

**Supplemental Figure 6.** Proposed **E1** and **E3/E4** structures. The exact mass of **E1** is 301.1670 (calculated for  $C_{18}H_{23}NO_3$ , 301.1678; mass error, 3.30 ppm) with a fragment 189.1272 (calculated for  $C_{13}H_{17}O$ , 189.1279). The exact mass of **E3/E4** is 275.1501 (calculated for  $C_{16}H_{21}NO_3$ , 275.1521; mass error, 7.58 ppm) with a fragment 163.1105 (calculated for  $C_{11}H_{15}O$ , 163.1123).

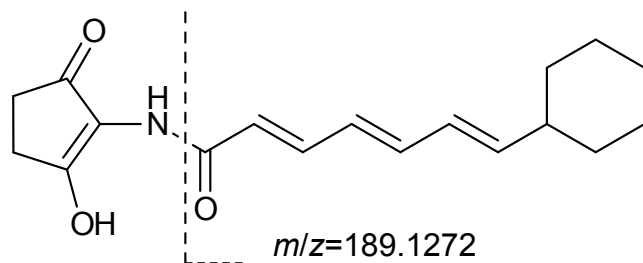

Compound **E1**

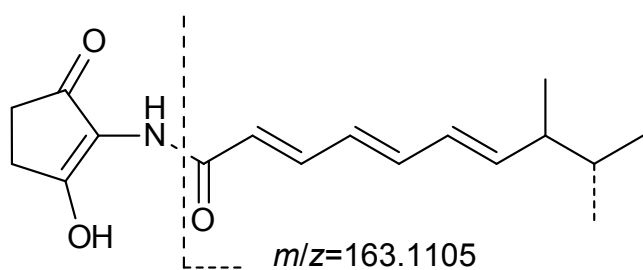

Compound **E3/E4**
